# Supplementary material for: Theoretical study on the interaction of pyrrolopyrimidine derivatives as LIMK2 inhibitors: insight into structure-based inhibitor design
Source: Royal Society of Chemistry journal article supplement (doi:10.1039/c3mb70168a), 2013-06-27
Supplement: c3mb70168a.pdf [file c3mb70168a.pdf]

## Supporting Materials

**Table S1.** The structures of 41 inhibitors

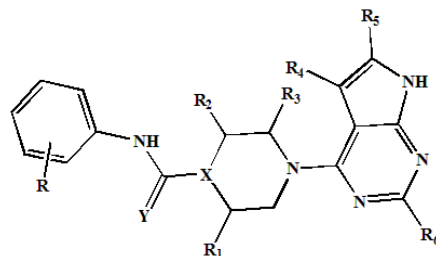

| No.  | X  | Y                   | R                 | R <sub>1</sub>                     | R <sub>2</sub>                     | R <sub>3</sub>     | R <sub>4</sub> | R <sub>5</sub> | R <sub>6</sub> | pIC <sub>50</sub> |
|------|----|---------------------|-------------------|------------------------------------|------------------------------------|--------------------|----------------|----------------|----------------|-------------------|
| 1    | CH | O                   | H                 | H                                  | H                                  | H                  | Me             | H              | H              | 6.1               |
| 5a*  | CH | O                   | 2-Me              | H                                  | H                                  | H                  | Me             | H              | H              | 4.94              |
| 5b*  | CH | O                   | 3-Me              | H                                  | H                                  | H                  | Me             | H              | H              | 6.19              |
| 5c*  | CH | O                   | 4-Me              | H                                  | H                                  | H                  | Me             | H              | H              | 5.89              |
| 5d*  | CH | O                   | 3-OMe             | H                                  | H                                  | H                  | Me             | H              | H              | 6.28              |
| 5e*  | CH | O                   | 4-OMe             | H                                  | H                                  | H                  | Me             | H              | H              | 5.82              |
| 5f   | CH | O                   | 3-OPh             | H                                  | H                                  | H                  | Me             | H              | H              | 7.19              |
| 5g*  | CH | O                   | 3-Br              | H                                  | H                                  | H                  | Me             | H              | H              | 6.52              |
| 11a* | N  | O                   | 3-Me              | H                                  | H                                  | H                  | Me             | H              | H              | 7.04              |
| 11b* | N  | O                   | 3-OMe             | H                                  | H                                  | H                  | Me             | H              | H              | 6.85              |
| 11c* | N  | O                   | 3-Br              | H                                  | H                                  | H                  | Me             | H              | H              | 7.42              |
| 12*  | N  | NCN                 | 3-Br              | H                                  | H                                  | H                  | Me             | H              | H              | 7.96              |
| 13*  | N  | O                   | 3-Br              | (S)-Me                             | H                                  | H                  | Me             | H              | H              | 8.41              |
| 14*  | N  | NCN                 | 3-Br              | (S)-Me                             | H                                  | H                  | Me             | H              | H              | 9.05              |
| 15*  | N  | O                   | 3-Br              | (S)-Me                             | H                                  | H                  | Me             | H              | H              | 7.43              |
| 16*  | N  | NCN                 | 3-Br              | (S)-i-Pr                           | H                                  | H                  | Me             | H              | H              | 8.38              |
| 17   | N  | NCN                 | 3-Br              | Me(trans)                          | H                                  | Me                 | Me             | H              | H              | 8.41              |
| 18   | N  | O                   | 3-Br              | Me(cis)                            | Me                                 | H                  | Me             | H              | H              | 6.88              |
| 19   | N  | O                   | 3-Br              | -CH <sub>2</sub> CH <sub>2</sub> - | -CH <sub>2</sub> CH <sub>2</sub> - | H                  | Me             | H              | H              | 7.80              |
| 20   | N  | NCN                 | 3-Br              | -CH <sub>2</sub> -                 | H                                  | -CH <sub>2</sub> - | Me             | H              | H              | 7.12              |
| 21a  | N  | NCN                 | 3-Br              | (S)-Me                             | H                                  | H                  | H              | H              | H              | 8.09              |
| 21b* | N  | NCN                 | 3-Br              | (S)-Me                             | H                                  | H                  | Cl             | H              | H              | 8.92              |
| 21c  | N  | NCN                 | 3-Br              | (S)-Me                             | H                                  | H                  | H              | Me             | H              | 8.38              |
| 22a* | N  | NSO <sub>2</sub> Me | 3-Br              | (S)-Me                             | H                                  | H                  | Me             | H              | H              | 8.17              |
| 22b  | N  | NCN                 | 3-Cl              | (S)-Me                             | H                                  | H                  | Me             | H              | H              | 8.8               |
| 22c  | N  | O                   | 3-Cl              | (S)-Me                             | H                                  | H                  | Me             | H              | H              | 8.64              |
| 22d  | N  | NCN                 | 3-F               | (S)-Me                             | H                                  | H                  | Me             | H              | H              | 8.74              |
| 22e  | N  | NCN                 | 3-Br,4-F          | (S)-Me                             | H                                  | H                  | Me             | H              | H              | 8.82              |
| 22f  | N  | O                   | 3-Br,4-F          | (S)-Me                             | H                                  | H                  | Me             | H              | H              | 8.49              |
| 22g  | N  | NCN                 | 3-CF <sub>3</sub> | (S)-Me                             | H                                  | H                  | Me             | H              | H              | 8.72              |
| 22h  | N  | NCN                 | 3-CN              | (S)-Me                             | H                                  | H                  | Me             | H              | H              | 8.92              |

|      |   |     |                                                        |        |   |   |    |   |   |      |
|------|---|-----|--------------------------------------------------------|--------|---|---|----|---|---|------|
| 22i  | N | NCN | 3-t-Bu                                                 | (S)-Me | H | H | Me | H | H | 8.96 |
| 22j  | N | O   | 3-OCONMe <sub>2</sub>                                  | (S)-Me | H | H | Me | H | H | 8.92 |
| 22k  | N | NCN | 3-CONH-i-Pr                                            | (S)-Me | H | H | Me | H | H | 8.46 |
| 22l  | N | O   | 3-CONH-i-Pr                                            | (S)-Me | H | H | Me | H | H | 8.26 |
| 22m* | N | NCN | 3-CONH(CH <sub>2</sub> ) <sub>2</sub> OH               | (S)-Me | H | H | Me | H | H | 9.10 |
| 22n  | N | O   | 3-CONH(CH <sub>2</sub> ) <sub>2</sub> OH               | (S)-Me | H | H | Me | H | H | 8.52 |
| 22o  | N | O   | 3-CONHCH(CH <sub>2</sub> OH) <sub>2</sub>              | (S)-Me | H | H | Me | H | H | 8.52 |
| 22p  | N | NCN | 3-CONH(CH <sub>2</sub> ) <sub>2</sub> NMe <sub>2</sub> | (S)-Me | H | H | Me | H | H | 8.47 |
| 22q  | N | NCN | SO <sub>2</sub> NH-i-Pr                                | (S)-Me | H | H | Me | H | H | 8.77 |
| 22r  | N | NCN | SO <sub>2</sub> NH(CH <sub>2</sub> ) <sub>2</sub> OH   | (S)-Me | H | H | Me | H | H | 8.54 |

\*Molecules selected for the MD simulations and free energy calculations

**Table S2.** The predicted binding free energies and the individual energy components for the studied molecules based on the solute dielectric constant of 1 (kcal/mol)

| No. | $\Delta E_{\text{vdw}}$ | $\Delta E_{\text{ele}}$ | $\Delta G_{\text{SA}}$ | $\Delta G_{\text{GB}}$ | $\Delta G_{\text{pred}}$ | pIC <sub>50</sub> |
|-----|-------------------------|-------------------------|------------------------|------------------------|--------------------------|-------------------|
| 22m | -53.71±3.50             | -52.02±5.13             | -7.59±0.36             | 64.24±3.42             | -49.09±3.31              | 9.10              |
| 14  | -50.95±2.94             | -26.53±6.28             | -6.53±0.13             | 42.45±4.78             | -41.56±2.92              | 9.05              |
| 21b | -52.61±3.63             | -22.02±5.82             | -6.42±0.21             | 37.81±4.17             | -43.23±3.92              | 8.92              |
| 13  | -48.68±3.14             | -7.99±6.35              | -6.27±0.12             | 25.54±5.48             | -37.39±2.59              | 8.41              |
| 16  | -56.03±3.57             | -34.29±2.93             | -6.79±0.08             | 49.42±3.42             | -47.85±2.38              | 8.38              |
| 22a | -50.10±2.78             | -24.04±7.17             | -6.96±0.18             | 46.34±6.67             | -34.76±2.89              | 8.17              |
| 12  | -50.49±2.72             | -31.37±5.01             | -6.47±0.21             | 48.64±4.15             | -39.68±2.74              | 7.96              |
| 15  | -45.35±3.11             | -17.94±5.24             | -6.47±0.17             | 33.25±4.30             | -36.51±3.11              | 7.43              |
| 11c | -52.50±3.76             | -7.78±6.40              | -6.07±0.13             | 27.03±5.89             | -39.31±3.29              | 7.42              |
| 11a | -40.42±3.21             | -6.56±4.71              | -6.08±0.17             | 20.66±3.56             | -32.41±2.81              | 7.04              |
| 11b | -47.08±2.96             | -7.95±3.21              | -6.44±0.28             | 25.52±2.69             | -35.96±2.82              | 6.85              |
| 5g  | -44.55±3.28             | -27.62±10.43            | -6.16±0.19             | 42.25±9.06             | -36.08±3.99              | 6.52              |
| 5d  | -46.88±4.42             | 4.12±11.50              | -6.75±0.30             | 15.31±11.87            | -34.20±3.58              | 6.28              |
| 5b  | -47.94±3.49             | -13.31±4.71             | -5.90±0.17             | 31.73±4.12             | -35.42±3.26              | 6.19              |
| 5c  | -43.49±3.68             | -13.17±5.72             | -6.54±0.20             | 30.75±5.77             | -32.45±3.47              | 5.89              |
| 5e  | -46.76±2.83             | -22.15±3.86             | -6.41±0.12             | 40.31±2.76             | -35.01±2.78              | 5.82              |
| 5a  | -41.79±4.74             | -14.52±6.39             | -5.75±0.28             | 31.01 ±6.18            | -31.06±4.68              | 4.94              |

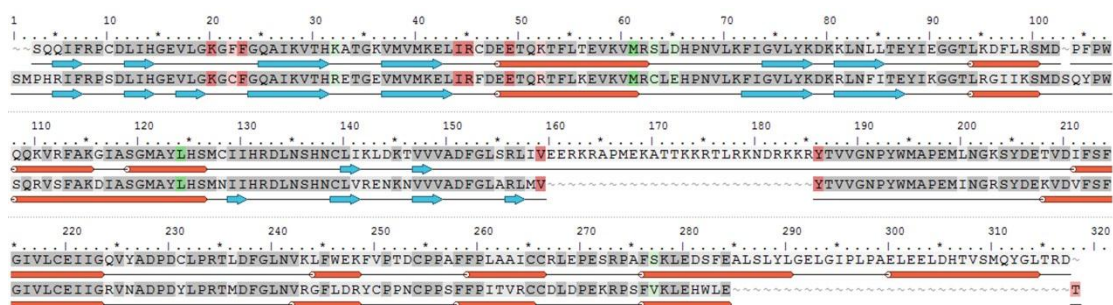

**Figure S1.** The sequence alignment between LIMK1 and LIMK2.

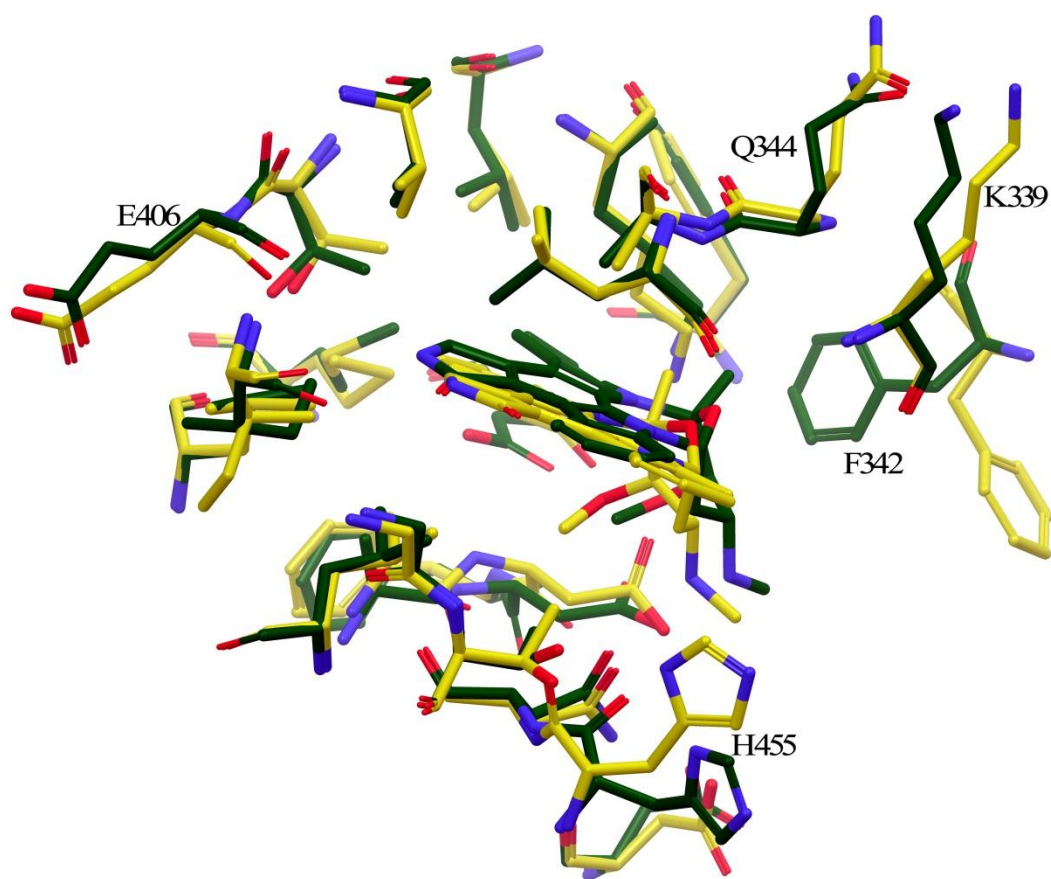

**Figure S2.** The docked pose of staurosporine predicted by *IFD* in the active site of LIMK2 overlapped with its original structure in the homology model (carbon atoms in the homology model are colored in dark green, and those in the docked structure in yellow).

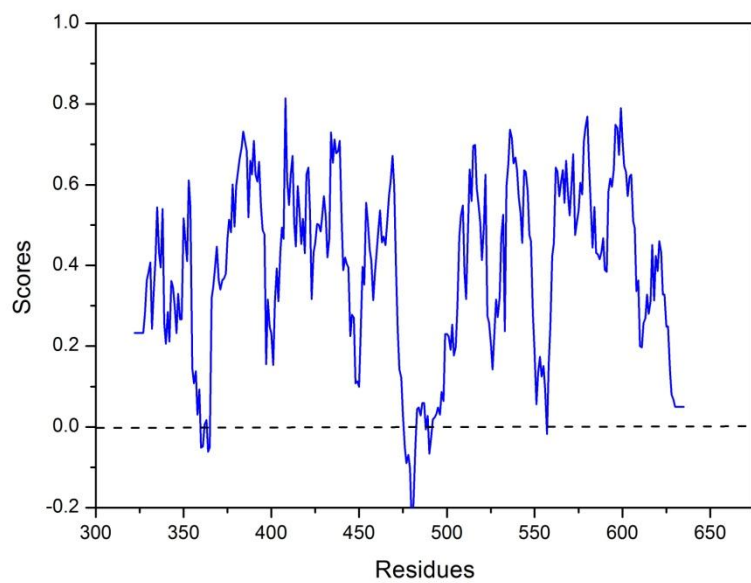

**Figure S3.** The Profile-3D scores for the LIMK2 structure generated by homology modeling

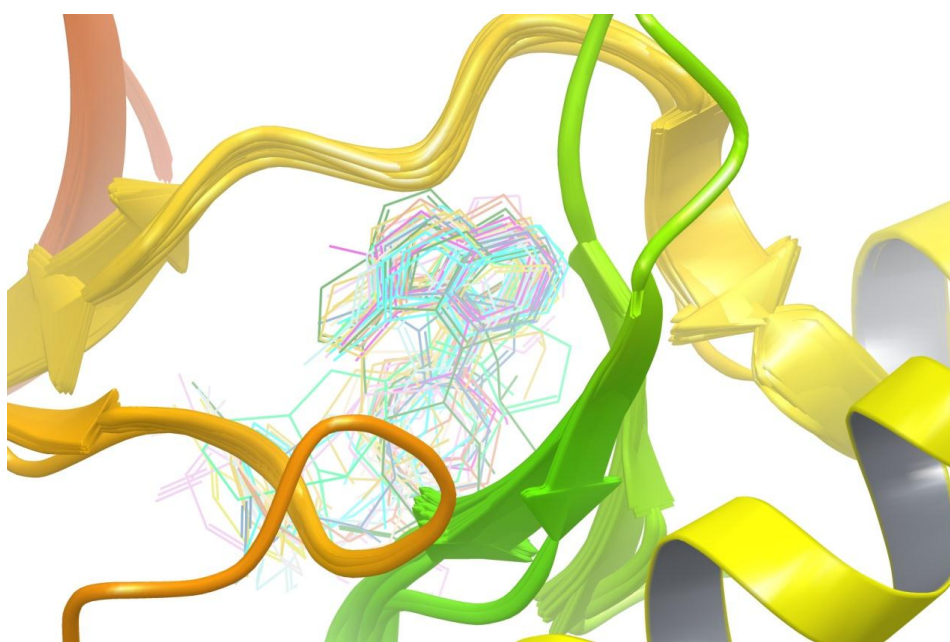

**Figure S4.** The alignments of 41 docked structures in the binding site of LIMK2.
